# Supplementary material for: Confinement induces stable calcium carbonate formation in silica nanopores
Source: Royal Society of Chemistry journal article supplement (doi:10.1039/d2nr01834a), 2022-01-01
Supplement: d2nr01834a1.pdf [file d2nr01834a1.pdf]

## Supplementary Information

### Confinement Induces Stable Calcium Carbonate Formation in Silica Nanopores

Hassnain Asgar,<sup>1,‡</sup> Sohaib Mohammed,<sup>1,‡</sup> and Greeshma Gadikota<sup>1,\*</sup>

<sup>‡</sup>equal contribution

<sup>1</sup>School of Civil and Environmental Engineering, Cornell University, Ithaca, NY 14853

---

\* Corresponding Author. Phone: +1 607-255-4796. E-mail: [gg464@cornell.edu](mailto:gg464@cornell.edu)

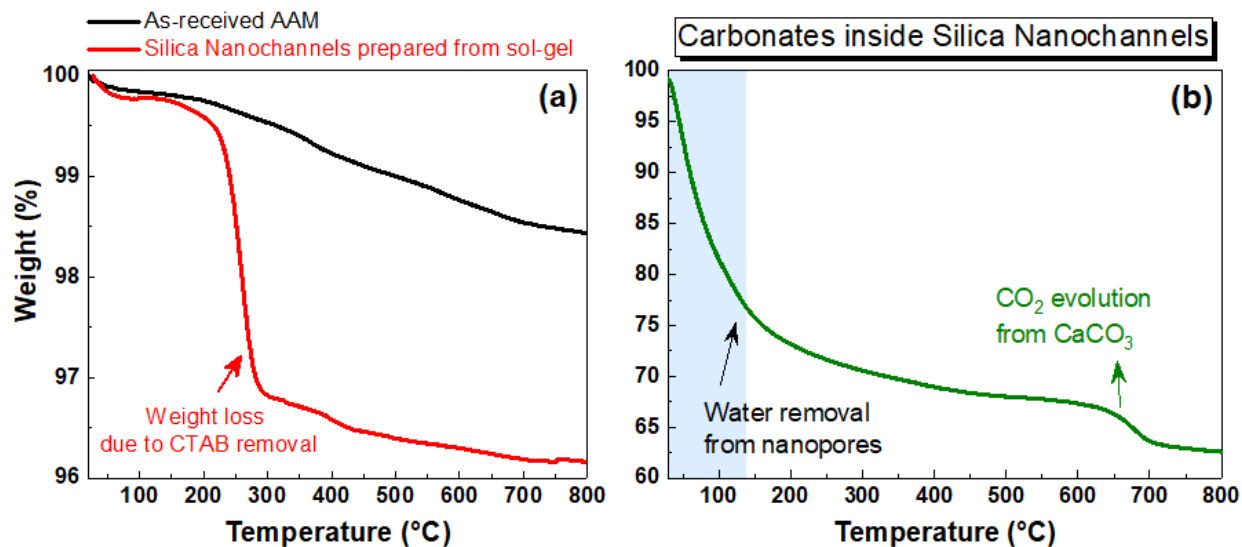

**Figure S1.** Estimation of weight changes using thermogravimetric analysis (TGA). **(a)** Changes in the weight loss of the as-received anodic alumina membrane (AAM) and silica nanochannels (SNCs) prepared using the sol-gel approach. Weight loss at 250 °C corresponds to CTAB removal from SNCs. **(b)** Changes in the weight associated with the dissociation of calcium carbonate formed in SNCs.

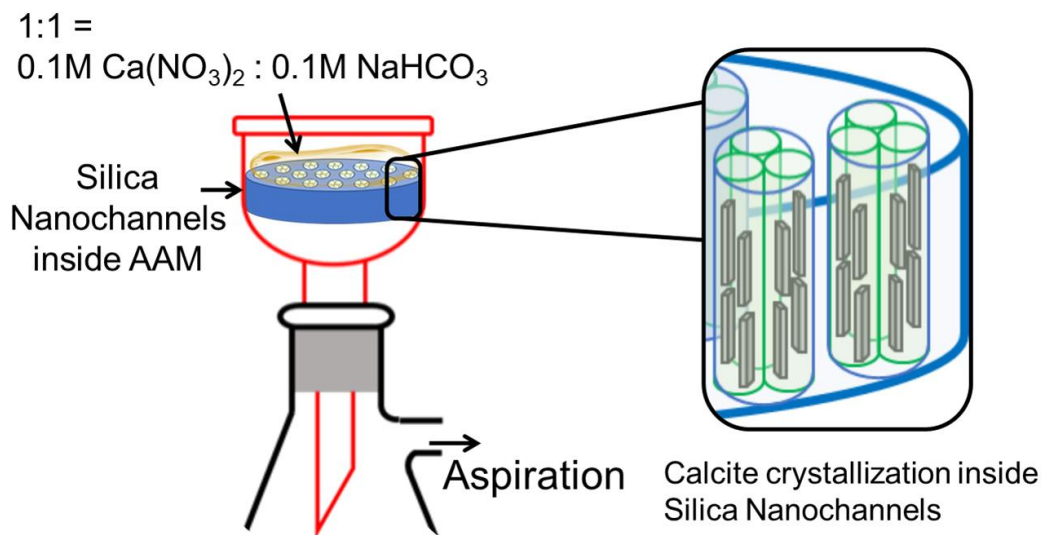

**Figure S2.** Loading of  $\text{Ca}^{2+}$  and  $\text{CO}_3^{2-}$  containing solutions in silica nanochannels. Schematic representation of sample preparation approach for carbonate formation inside silica nanochannels and organization of the formed carbonate crystals.

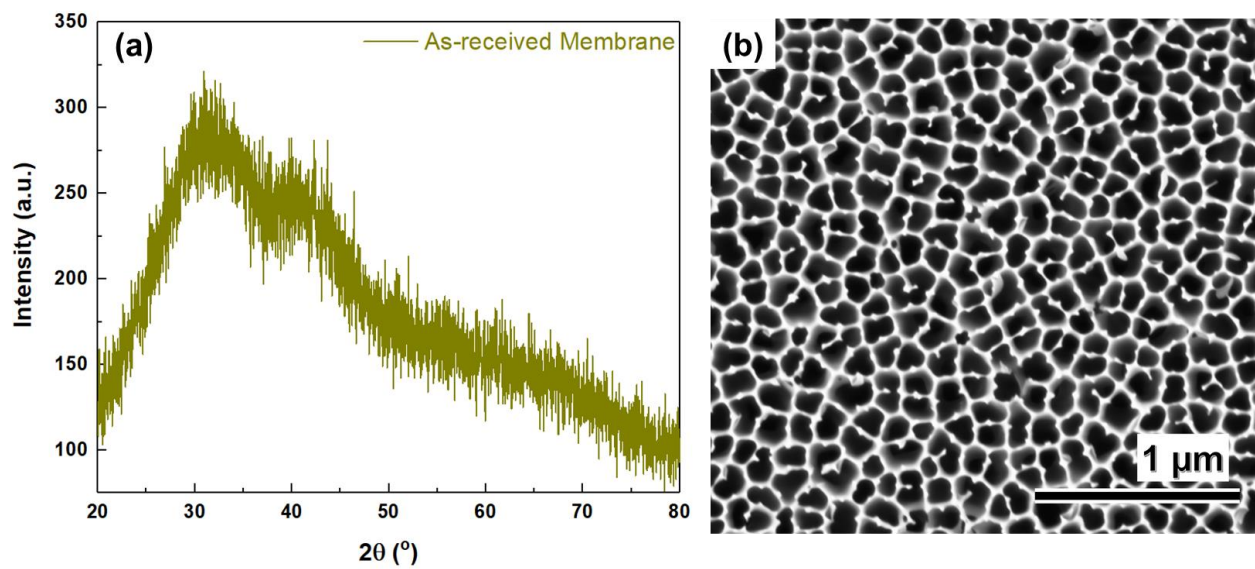

**Figure S3.** Characterization of the as-received Anodic Alumina Membrane (AAM). (a) The amorphous structure of the as-received anodic alumina membrane (AAM) determined using XRD. (b) Morphology of as-received membrane imaged using SEM.

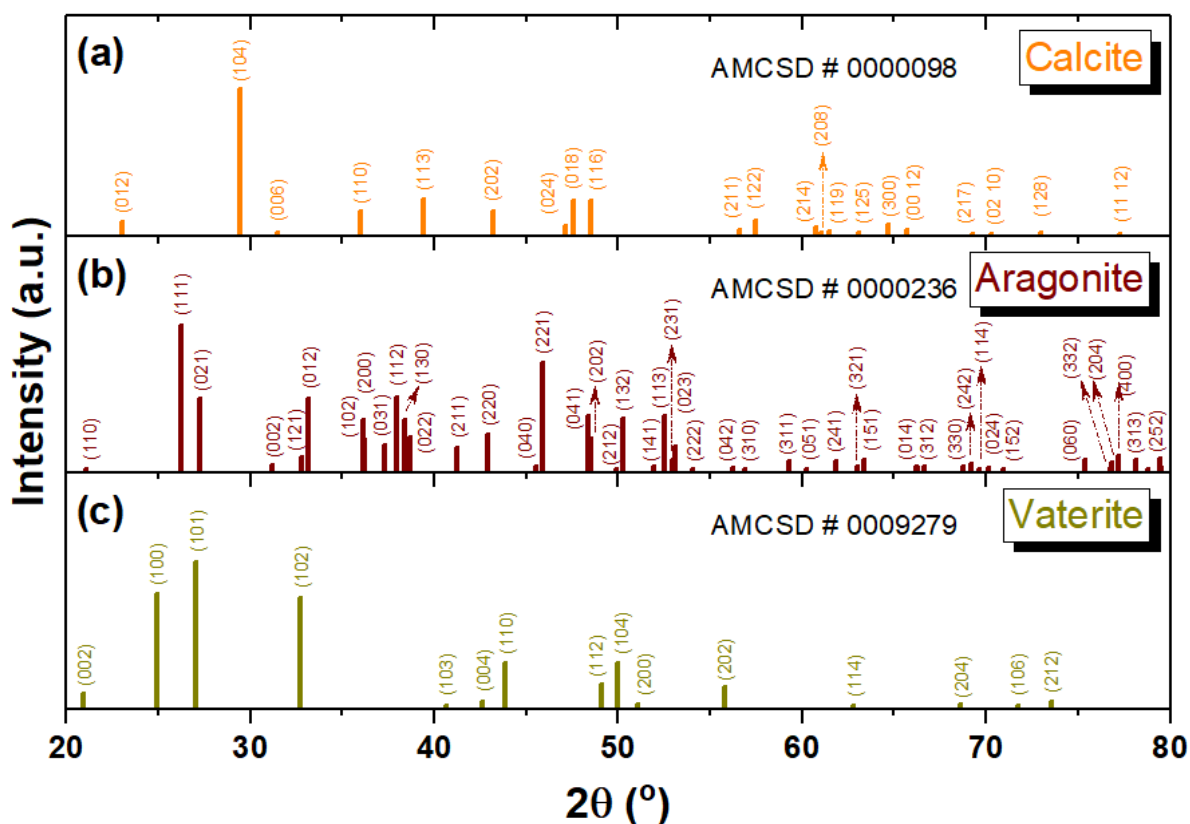

**Figure S4.** X-ray diffraction (XRD) patterns of different polymorphs of calcium carbonate. Identification of different planes in polymorphs of calcium carbonate (CaCO<sub>3</sub>) as reported in the American Mineralogist Crystal Structure Database (AMCSID). **(a)** XRD pattern of calcite. **(b)** Aragonite. **(c)** vaterite. The referred AMCSID datasets are also mentioned.

**Table S1.** The forcefields parameters of the atoms in silica pores, water molecules and ions are obtained from the references listed in Ref. column.

| Atom                 | $\sigma$ (nm) | $\varepsilon$ (kJ/mol)  | q (e)   | Ref. |
|----------------------|---------------|-------------------------|---------|------|
| <b>Silica</b>        |               |                         |         |      |
| Si                   | 0.302         | $7.7006 \times 10^{-6}$ | 2.1000  | 1    |
| O bridging           | 0.316         | 0.650190                | -1.0500 | 1    |
| O nonbridging        | 0.316         | 0.650190                | -0.9500 | 1    |
| H                    | 0.000         | 0.000000                | 0.4250  | 1    |
| <b>SPCE</b>          |               |                         |         |      |
| O                    | 0.316         | 0.6502                  | -0.82   | 2    |
| H                    | 0.000         | 0.000                   | 0.41    | 2    |
| <b>Ions</b>          |               |                         |         |      |
| Ca <sup>2+</sup>     | 0.2412        | 1.88136                 | 2.000   | 3    |
| C (CO <sub>3</sub> ) | 0.356         | 0.29288                 | 1.420   | 3    |
| O (CO <sub>3</sub> ) | 0.303         | 0.50208                 | -1.140  | 3    |

$\sigma$  is the finite distance at which the interatomic potential is zero.

$\varepsilon$  is the depth of the potential well.

q is the atomic charge.

## References

- 1 R. T. Cygan, J. J. Liang and A. G. Kalinichev, *J. Phys. Chem. B*, 2004, **108**, 1255–1266.
- 2 H. J. C. Berendsen, J. R. Grigera and T. P. Straatsma, *J. Phys. Chem.*, 1987, **91**, 6269–6271.
- 3 W. L. Jorgensen, D. S. Maxwell and J. Tirado-Rives, *J. Am. Chem. Soc.*, 1996, **118**, 11225–11236.
